# Supplementary material
Source: PubMed Central journal article supplement (PMC5973792)
Supplement: NIHMS969604-supplement-TableS1.pdf [file NIHMS969604-supplement-TableS1.pdf]

| <b>Subjects</b> | <b>Diagnosis</b>    | <b>Spinal cord region</b> | <b>PMI (hr)</b> | <b>Age at time of death (yr)</b> | <b>Gender</b> |
|-----------------|---------------------|---------------------------|-----------------|----------------------------------|---------------|
| Contro1 1       | Heart Failure       | Cervical                  | 8               | 85                               | F             |
| Control 2       | Alzheimer's disease | Cervical                  | 8               | 86                               | F             |
| Patient 1       | ALS                 | Cervical                  | 6               | 66                               | M             |
| Patient 2       | ALS                 | Cervical                  | 8               | 36                               | M             |
| Patient 3       | ALS                 | Cervical                  | 6               | 69                               | M             |
| Patient 4       | ALS                 | Cervical                  | 7               | 64                               | F             |
