# Supplementary material
Source: PubMed Central journal article supplement (PMC5973792)

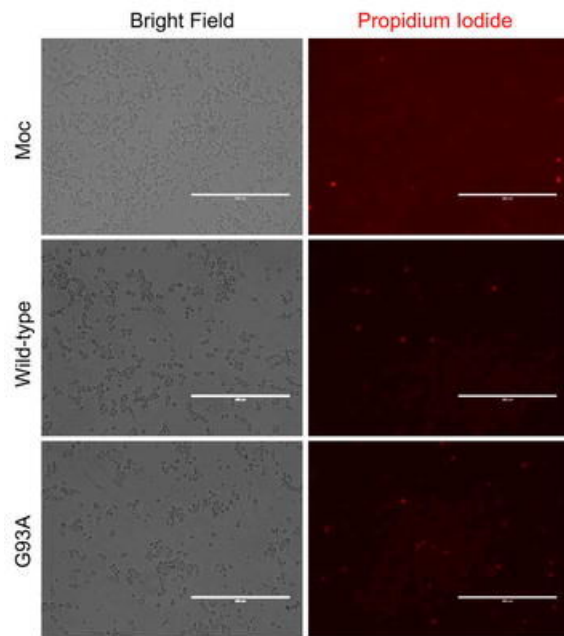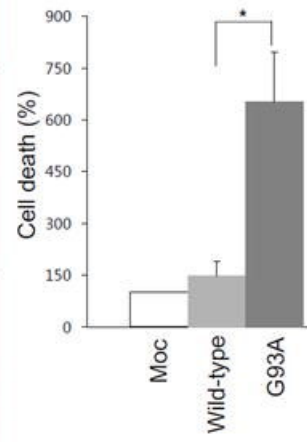

Supplement: NIHMS969604-supplement-Fig4.pdf [file NIHMS969604-supplement-Fig4.pdf]

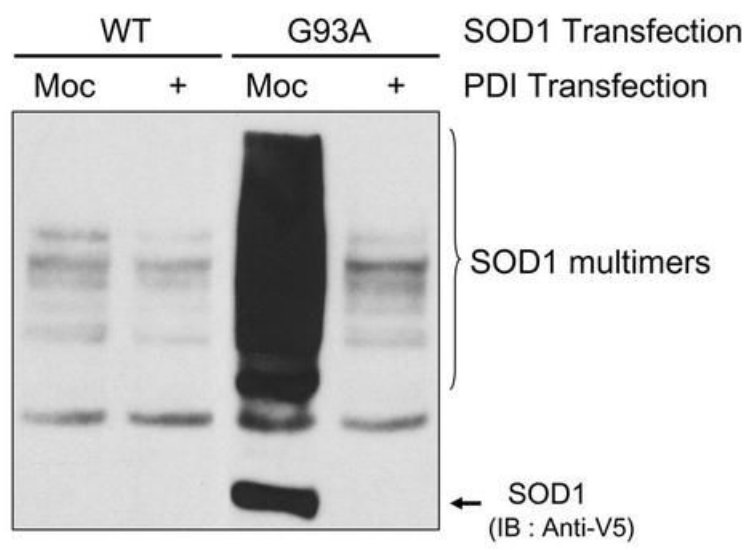

Supplement: NIHMS969604-supplement-FigS1.pdf [file NIHMS969604-supplement-FigS1.pdf]

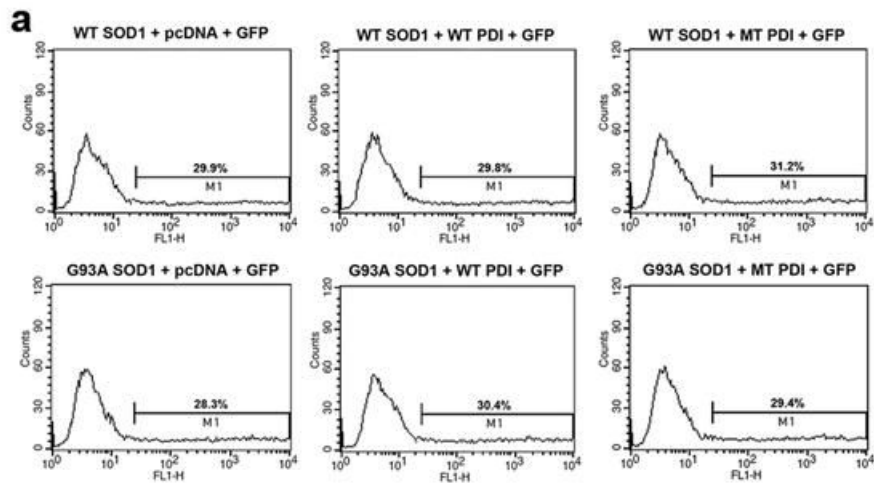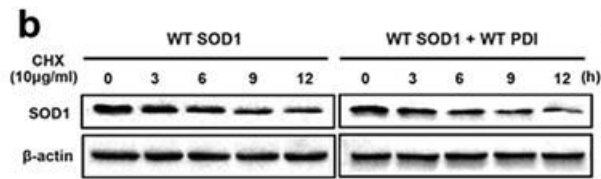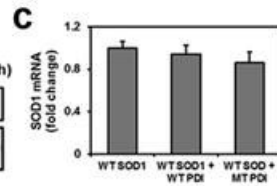

Supplement: NIHMS969604-supplement-FigS2.pdf [file NIHMS969604-supplement-FigS2.pdf]

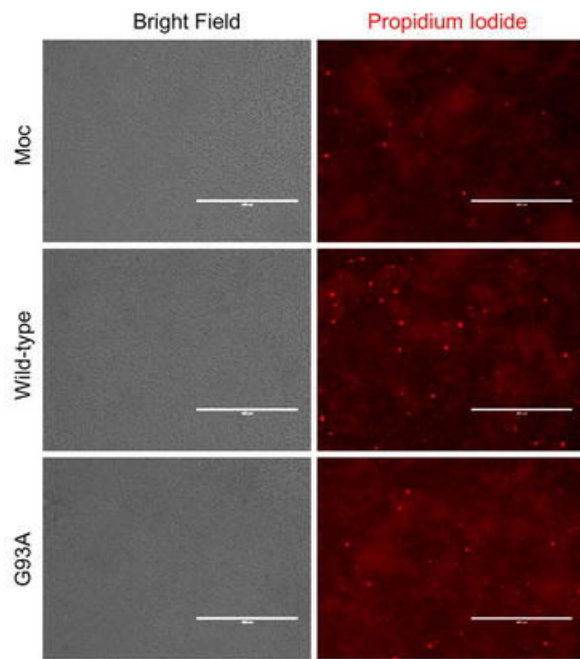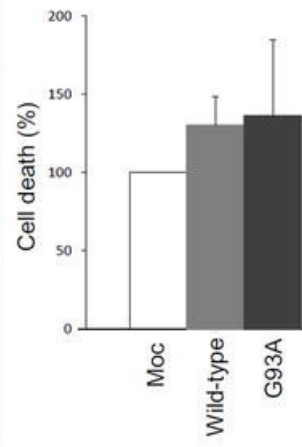

Supplement: NIHMS969604-supplement-FigS3.pdf [file NIHMS969604-supplement-FigS3.pdf]

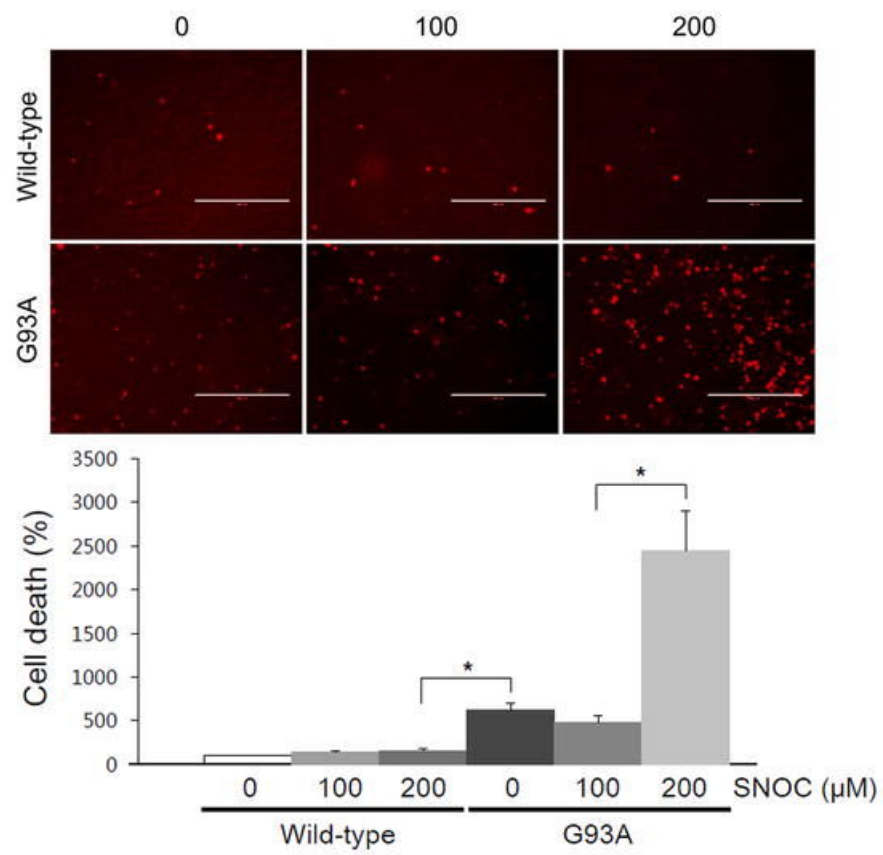

Supplement: NIHMS969604-supplement-FigS5.pdf [file NIHMS969604-supplement-FigS5.pdf]
